# Supplementary material for: Superoxide dismutase ameliorates oxidative stress and regulates liver transcriptomics to provide therapeutic benefits in hepatic inflammation
Source: PeerJ. 2023 Aug 11;11:e15829. doi: 10.7717/peerj.15829 (PMC10424669; doi:10.7717/peerj.15829)
Supplement: Data S1 [file peerj-11-15829-s001.xlsx]

## Sheet: Bodyweight
Group	Bodyweight (g)
	DAY1	DAY2	DAY3	DAY4	DAY5	DAY6	DAY7	DAY8	DAY9	DAY10	DAY11	DAY12	DAY13	DAY14	DAY15	DAY16
Control (n = 6)	23.1	23.5	24	24.8	26	26.6	27.4	28.5	29.6	30.3	31	32.2	33.5	34.4	35.6	36.4
	23.5	23.7	24.1	24.9	25.5	26	27	28.1	29	29.8	30.7	31.5	32.8	33.6	34.9	35.5
	23.6	24.1	24.5	25.5	26.4	27	28.1	28.9	30.1	30.9	31.6	32.8	33.9	35.1	36.2	37
	24	24.8	25	25.8	26.6	27.1	28.3	29.2	30.2	31.6	32.2	32.9	33.8	35.2	36.1	37.1
	24.5	25.2	25.3	26	27.1	28.2	29	29.6	30.6	31.8	32.9	33.4	34.2	35	36.1	36.9
	25	25.4	25.5	26.4	27.3	28.3	29.1	29.9	30.5	31.5	32.8	33.5	34.6	35.6	36.5	37
DON (n = 6)	22.8	23.1	23.2	23.5	23.8	24.6	25	25.6	26	26.7	27	27.6	28	28.3	28.6	29.1
	22.9	23.4	24	24.6	25	25.4	26	26.4	26.8	27.4	27.9	28.2	28.6	29.1	29.5	30
	23.5	24.2	24.4	24.7	25.5	26	26.5	26.9	27.4	27.9	28.3	28.6	29	29.3	29.9	30.5
	23.7	24.3	24.6	24.9	25.3	25.9	26.2	26.5	27.2	27.5	28	28.3	28.7	29.1	29.9	30.6
	24.5	25.1	25.1	25.3	25.8	26.4	26.6	27	27.4	27.9	28.2	28.8	29.3	30	30.6	31
	25	25.8	26	26.2	26.5	27	27.4	27.6	28	28.3	28.6	28.9	29.4	29.8	30.4	30.7
High-dose SOD (n = 6)	22.3	22.6	22.8	23.5	24.2	25.1	26	26.5	27.4	28.3	29	29.9	30.8	31.5	32.6	33.4
	22.5	22.9	23.2	24	24.8	25.8	26.7	27.6	28.3	29.1	30	30.6	31.7	32	32.9	33.6
	23	23.4	23.6	24.3	25.1	26	26.9	27.8	28.6	29.63	30.5	31	31.9	32.6	33.1	34
	23.2	23.9	24.2	24.9	25.6	26.5	27.4	28.3	29	29.8	30.6	31.4	32.1	33	33.6	34.8
	23.8	24.2	24.5	25.1	26	26.9	27.6	28.6	29.3	29.9	30.8	31.7	32.5	33.2	34	34.6
	24	24.6	24.8	25.5	26.4	27.6	28.2	29	29.6	30.3	31.2	32.2	32.9	33.4	34.2	35.1
Medium-dose SOD (n = 6)	22.2	22.8	23	23.8	24.5	25	25.7	26.1	26.8	27.7	28.7	29.6	30.6	31.2	32	32.6
	22.5	22.9	23.1	24	24.7	25.5	26.4	26.9	27.3	28.2	29	30.1	31.2	32.2	33.1	33.6
	23	23.6	24	24.6	25.3	26.3	27.1	27.9	28.6	29	29.6	30.5	31.4	32.3	33	33.8
	23.1	23.8	24	24.9	25.6	26.8	27.6	28.5	29.1	29.9	30.6	31.1	31.9	32.8	33.4	34
	23.5	24.3	24.6	25.2	26	26.9	27.8	28.8	29.6	30.1	30.9	31.6	32.2	33.1	34	34.6
	24.6	25.1	25.5	26	26.5	27.1	28	28.9	29.8	30.6	31.2	32	32.8	33.5	34.4	34.8
Low-dose SOD (n = 6)	22.2	22.9	23.3	23.6	24.1	24.5	25	25.8	26.8	27.5	28.6	29.2	29.8	30.6	31.1	31.8
	22.3	23.1	23.6	24.2	24.5	25	25.6	26.3	27	27.8	28.4	29.1	29.9	30.5	31	31.7
	22.8	23.6	23.8	24.5	25	25.6	26.4	27.1	28	28.6	29.3	29.8	30.6	31	31.8	32.5
	23.1	23.8	24	24.6	25.3	26	26.8	27.4	27.9	28.6	29.2	29.7	30.4	30.8	31.6	32.1
	23.6	24.5	24.9	25.3	26	26.8	27.1	27.9	28.6	29.1	29.5	30.3	31	31.7	32.5	33.4
	24	24.6	24.9	25.5	26.3	27	27.6	28.2	28.9	29.4	29.8	30.2	30.9	31.5	32	32.6

## Sheet: Last day bodyweight
	Control group (n = 6)	DON group (n = 6)	Low-dose SOD group (n = 6)	Medium-dose SOD group (n = 6)	High-dose SOD group (n = 6)
Bodyweight (g)	36.4	29.1	31.8	32.6	33.4
	35.5	30	31.7	33.6	33.6
	37	30.5	32.5	33.8	34
	37.1	30.6	32.1	34	34.8
	36.9	31	33.4	34.6	34.6
	37	30.7	32.6	34.8	35.1

## Sheet: Antioxidant indicators
Group	Serum SOD (U/mL)	Liver SOD (U/mL)	Serum GSH (mg/L)	Liver GSH (mg/L)	Serum CAT (U/mL)	Liver CAT (U/mL)	Serum GPX (U/mL)	Liver GPX (U/mL)	Serum TAOC (mmol/mL)	Liver TAOC (mmol/mL)
Control (n = 6)	84.79	196.74	31.01	42.13	8.04	27.69	191.86	292.94	0.75	0.83
	71.3	233.25	33.83	37.88	10.12	29.67	186.05	368.86	0.8	0.95
	79.01	183.35	26.94	43.94	9.67	25.59	238.37	380.1	0.7	0.79
	74.28	226.04	23.5	35.17	8.22	32.23	203.49	322.58	0.85	0.97
	86.72	202.95	36.03	45.27	11.47	30.98	220.93	356.71	0.76	0.86
	76.56	185.27	39.47	40.34	9.3	22.91	197.67	284.82	0.82	0.75
DON (n = 6)	25.23	60.58	11.9	10.58	2.8	7.81	58.14	99.78	0.25	0.23
	23.83	67.29	8.77	13.11	3.25	8.79	69.77	90.93	0.34	0.34
	20.67	64.6	10.96	8.1	2.44	8.12	63.95	114.98	0.2	0.26
	27.68	53.59	9.4	14.12	2.89	9.07	52.33	100.87	0.25	0.29
	21.9	63.81	8.15	11.72	3.52	8	75.58	92.15	0.33	0.22
	18.22	56.79	10.65	9.86	2.62	9.48	46.51	106	0.23	0.21
High-dose SOD (n = 6)	72.53	161.99	27.57	30.13	6.5	17.19	162.79	282.09	0.68	0.6
	65.69	168.97	28.82	34.15	8.04	19.2	156.98	250.25	0.62	0.64
	60.26	152.68	24.44	31.01	7.41	22.51	168.61	239.19	0.6	0.68
	69.2	162.01	22.56	27.57	9.12	25.11	180.23	272.22	0.69	0.62
	57.46	169.41	25.37	33.51	7.77	20.2	174.42	261.36	0.57	0.64
	67.1	154.25	26	30.42	7.23	26.79	151.16	279.57	0.54	0.69
Medium-dose SOD (n = 6)	40.99	115.68	16.29	21.49	5.15	13.91	116.28	204.76	0.37	0.51
	45.72	125.8	20.36	26.41	5.69	15.82	133.72	217.69	0.5	0.49
	39.59	137.25	17.54	25.81	5.78	17.63	127.91	207.23	0.43	0.58
	51.5	105.83	21.93	28.65	5.06	13.39	139.54	196.82	0.46	0.55
	42.39	113.28	19.11	20.61	5.69	19.21	122.09	206.26	0.49	0.5
	56.58	141.22	23.81	25.1	5.24	16.28	104.65	192.03	0.39	0.52
Low-dose SOD (n = 6)	25.93	86.07	15.04	13.78	3.88	9.06	81.4	128	0.32	0.28
	30.66	81.44	11.59	17.18	3.43	11.63	93.02	135.46	0.34	0.36
	39.77	75.43	13.16	14.05	4.16	13.78	87.21	138.35	0.29	0.38
	32.58	78.57	16.29	17.8	3.25	9.72	75.58	121.07	0.32	0.32
	23.47	85.93	10.02	15.44	3.43	11.4	69.77	126.68	0.26	0.38
	37.66	72.28	12.22	18.42	3.88	10.86	98.84	146.51	0.33	0.33

## Sheet: Liver physiological indicators
Group	Serum AST (U/mL)	Liver AST (U/mL)	Serum ALT (U/mL)	Liver ALT (U/mL)
Control (n = 6)	4.16	45.32	5.09	48.3
	6.22	41.39	6.32	53.02
	4.88	54.11	4.47	41.08
	6.85	57.78	7.54	47.23
	5.56	47.9	6.93	49.34
	7.45	52.43	5.71	43.1
DON (n = 6)	31.62	298.31	34.81	305.12
	37.67	271.87	41.36	278.07
	34.68	248.27	38.35	283.37
	38.94	301.57	45.86	298.09
	33.26	275.5	32.77	272.32
	40.93	347.87	34.81	263.38
High-dose SOD (n = 6)	9.65	99.18	16.27	103.44
	12.44	86.03	11.7	87.95
	14.82	109.1	13.43	93.43
	11.11	95.95	9.34	82.22
	12.86	83.59	12.86	106.98
	9.65	101.17	11.11	85.59
Medium-dose SOD (n = 6)	20.84	203.75	27.61	189.46
	24.59	191.86	25.51	178.4
	21.39	236.75	21.77	199.63
	23.54	171.82	28.65	183.23
	26.14	198.82	22.31	194.83
	24.33	181.82	20.14	165.52
Low-dose SOD (n = 6)	32.16	236.9	29.17	212.66
	29.76	263.25	34.81	243.79
	31.08	224.61	27.61	239.33
	34.97	302.72	35.83	277.07
	32.16	259.14	29.69	232.62
	26.14	227.79	30.72	250.33

## Sheet: OS mice serum SOD
Group	OS mice serum SOD (U/mL)
Control	168.293
	249.865
	158.856
DON	183.148
	166.025
	170.159
SOD	199.045
	180.085
	201.095

## Sheet: IL-1 and IL-6 mRNA
Group	Relative expression level
	IL-1 mRNA	IL-6 mRNA
Control	0.55	2.68
	0.64	2.39
	0.7	2.29
	0.66	1.78
	0.83	1.94
DON	3.01	10.39
	3.04	9.22
	4.25	8.41
	3.11	8.06
	4.38	7.39
SOD	2.69	4.81
	2.14	5.89
	2.23	4.89
	2.2	6.21
	1.85	5.49

## Sheet: Genes with P-values <0.01
Genes (P-values <0.01)	BaseMean
	DON	SOD
Cebpb	1119	164.282
Tmem238	422.809	95.6487
9130409I23Rik	321.989	1091.96
Rab5if	765.308	273.843
Hnrnpab	2295.04	1005.6
Taf10	835.39	364.446
Rab36	158.133	416.716
Endog	310.258	130.527
Nt5dc1	163.6	465.348
Mlh1	324.418	139.03
Zfp771	326.742	138.545
Hnrnpa0	1589.6	835.474
Tmem160	250.452	116.114
Glrx5	2116.69	1197.18
Arhgef10	138.391	304.533
Ifit1	79.4017	171.061
Pkp1	112.701	44.612
Ifi44l	0	16.146
Rab43	137.308	56.0231
Smim24	1.43	17.6441
Nr2f6	784.935	436.668
Ifit3	126.65	250.952
Hand2	142.996	67.1721
Epop	67.1004	25.0773
Mup1	28.954	23732.9
Treh	73.9656	28.8075
Tmie	179.277	397.418
Cyp3a41b	2628.75	1330.86
Apol9a	161.583	844.654
Frat2	66.9569	26.3886
Ank	2666.68	1650.08

## Sheet: Differentially expressed genes
id	name	foldChange(G4/G1)(G4/G1)	log2FoldChange	pval	padj	G1_3:read count	G1_3:fpkm	G1_4:read count	G1_4:fpkm	G1_5:read count	G1_5:fpkm	G4_3:read count	G4_3:fpkm	G4_4:read count	G4_4:fpkm	G4_5:read count	G4_5:fpkm
ENSMUSG00000038768	9130409I23Rik	3.39131	1.76184	1.49379e-09	8.33782e-06	345	10.5215	325	10.54	373	12.1198	1015	35.6545	977	38.2053	994	35.3124
ENSMUSG00000020175	Rab36	2.63523	1.39793	6.49103e-05	0.155275	106	0.992986	245	2.44063	146	1.45719	460	4.96345	376	4.51643	310	3.38283
ENSMUSG00000039480	Nt5dc1	2.84444	1.50814	0.000110718	0.205996	83	1.37071	325	5.70755	97	1.70673	523	9.94851	324	6.86092	458	8.81078
ENSMUSG00000071176	Arhgef10	2.20053	1.13785	0.00225903	1	132	0.829602	192	1.2832	118	0.790141	345	2.49749	158	1.27328	365	2.67221
ENSMUSG00000034459	Ifit1	2.15437	1.10727	0.00357294	1	96	2.09218	76	1.76133	87	2.0201	223	5.59785	138	3.85635	117	2.97026
ENSMUSG00000039146	Ifi44l	Inf	Inf	0.00373201	1	0	0	0	0	0	0	0	0	17	0.916972	25	1.22506
ENSMUSG00000078439	Smim24	12.3385	3.6251	0.00407194	1	4	0.218841	1	0.0581793	0	0	24	1.51241	4	0.280608	24	1.52955
ENSMUSG00000078683	Mup1	819.675	9.67891	0.00661336	1	2	0.0730853	66	2.56474	19	0.739743	2413	101.566	45758	2144.06	8537	363.402
ENSMUSG00000049555	Tmie	2.21679	1.14847	0.00731641	1	184	3.44233	189	3.76007	206	4.1061	262	5.6458	391	9.37955	414	9.0223
ENSMUSG00000057346	Apol9a	5.22739	2.38609	0.00889149	1	135	1.31266	192	1.98527	189	1.95798	1441	16.1388	655	8.16641	305	3.45463
ENSMUSG00000021200	Asb2	3.86245	1.94952	0.0101833	1	17	0.277815	21	0.364943	25	0.435285	119	2.23997	22	0.460999	83	1.58003
ENSMUSG00000053007	Creb5	5.71641	2.51511	0.0109658	1	2	0.0046268	6	0.0147605	3	0.00739433	34	0.090598	5	0.0148317	21	0.0565916
ENSMUSG00000057465	Saa2	2.53295	1.34082	0.012375	1	10	0.229879	183	4.47352	70	1.71445	192	5.08382	201	5.92469	207	5.54309
ENSMUSG00000037379	Spon2	2.1551	1.10776	0.0142208	1	82	1.6106	146	3.04949	76	1.59043	224	5.06772	206	5.18815	133	3.04305
ENSMUSG00000072949	Acot1	4.10549	2.03756	0.0148306	1	18	0.26586	29	0.455488	15	0.236047	31	0.527389	85	1.60979	95	1.6345
ENSMUSG00000049313	Sorl1	2.05276	1.03756	0.0177443	1	30	0.153388	58	0.315353	54	0.294165	106	0.62426	63	0.41303	90	0.536037
ENSMUSG00000056328	Myh1	Inf	Inf	0.020431	1	0	0	0	0	0	0	1	0.0104946	0	0	2742	29.1022
ENSMUSG00000044748	Defb1	3.34005	1.73987	0.0217304	1	6	0.398281	19	1.34119	6	0.424343	20	1.52918	34	2.89393	35	2.70638
ENSMUSG00000035692	Isg15	2.01011	1.00728	0.0249668	1	158	13.0094	127	11.1199	152	13.3343	356	33.7628	248	26.1832	142	13.6198
ENSMUSG00000003352	Cacnb3	3.41244	1.7708	0.0255059	1	12	0.173218	7	0.10745	8	0.123035	38	0.631806	7	0.129562	37	0.622149
ENSMUSG00000039196	Orm1	2.40614	1.26672	0.0255762	1	297	22.1825	1012	80.3772	1512	120.319	2455	211.2	2227	213.277	1219	106.057
ENSMUSG00000034593	Myo5a	2.73664	1.45241	0.0260881	1	24	0.0938462	13	0.0540565	12	0.0499935	56	0.252222	17	0.0852363	44	0.20042
ENSMUSG00000054072	Iigp1	2.59459	1.37551	0.0261079	1	3034	30.1595	5811	61.4269	2925	30.9786	15889	181.926	6202	79.0516	5634	65.239
ENSMUSG00000026728	Vim	2.07833	1.05543	0.0282094	1	479	5.84572	391	5.07432	463	6.02019	1132	15.9125	317	4.96057	1024	14.5574
ENSMUSG00000068246	Apol9b	4.8084	2.26556	0.0304734	1	167	5.30838	311	10.5125	277	9.38107	1974	72.2739	1012	41.2474	244	9.03477
ENSMUSG00000017969	Ptgis	2.1222	1.08556	0.0320555	1	46	1.03726	29	0.695387	35	0.840862	67	1.74018	40	1.15654	93	2.44284
ENSMUSG00000032011	Thy1	2.17338	1.11994	0.0326027	1	35	0.676436	26	0.534356	31	0.638333	99	2.20385	29	0.718665	50	1.12567
ENSMUSG00000041329	Atp1b2	3.14433	1.65275	0.0334036	1	9	0.127528	14	0.210955	13	0.196261	14	0.228497	33	0.59958	48	0.792294
ENSMUSG00000078597	Cyp4a12b	2.33917	1.226	0.0336009	1	1052	25.4253	3217	82.6799	1607	41.3802	3537	98.4632	4856	150.487	3384	95.2713
ENSMUSG00000042485	Mustn1	2.03374	1.02414	0.0349579	1	39	1.82642	34	1.69323	46	2.29521	77	4.15352	46	2.76226	87	4.74611
ENSMUSG00000018893	Mb	Inf	Inf	0.0357487	1	0	0	0	0	0	0	0	0	0	0	890	40.2215
ENSMUSG00000030399	Ckm	Inf	Inf	0.0364416	1	0	0	0	0	0	0	0	0	0	0	856	19.8139
ENSMUSG00000037440	Vnn1	2.24652	1.16769	0.0378996	1	193	4.62398	331	8.43306	192	4.90102	290	8.00286	412	12.6569	676	18.8663
ENSMUSG00000061723	Tnnt3	1638.74	10.6784	0.038836	1	0	0	1	0.0388842	0	0	4	0.16847	1	0.0468862	1592	67.8109
ENSMUSG00000043263	Ifi209	3.42623	1.77662	0.0390433	1	23	0.375337	20	0.347075	14	0.243416	111	2.08644	31	0.648673	33	0.627321
ENSMUSG00000000628	Hk2	2.80475	1.48787	0.0405199	1	23	0.223039	34	0.350616	28	0.289294	102	1.13931	18	0.223819	100	1.12963
ENSMUSG00000041202	Pla2g2d	27.3033	4.771	0.0405519	1	2	0.0516126	0	0	0	0	33	0.98091	0	0	13	0.390797
ENSMUSG00000062661	Ncs1	9.2002	3.20167	0.0417386	1	2	0.0248801	1	0.0132288	1	0.0132541	6	0.0859731	5	0.0797558	20	0.289824
ENSMUSG00000032294	Pkm	2.2848	1.19207	0.041997	1	174	2.01395	194	2.38781	210	2.58967	604	8.05238	126	1.86999	475	6.40433
ENSMUSG00000079507	H2-Q1	3.12309	1.64297	0.0424862	1	38	0.769082	82	1.76483	76	1.63881	145	3.38023	246	6.38403	118	2.78197
ENSMUSG00000033196	Myh2	1657.64	10.6949	0.044268	1	1	0.00811035	0	0	0	0	0	0	0	0	1296	12.2441
ENSMUSG00000022096	Hr	2.39556	1.26036	0.0459981	1	19	0.158952	13	0.115652	20	0.178266	63	0.607074	14	0.150179	35	0.341084
ENSMUSG00000028364	Tnc	3.16264	1.66113	0.0460715	1	12	0.0893725	24	0.190078	8	0.0634804	38	0.325983	17	0.162346	71	0.615974
ENSMUSG00000021622	Ckmt2	Inf	Inf	0.0482921	1	0	0	0	0	0	0	0	0	0	0	483	21.9162
ENSMUSG00000031538	Plat	7.65264	2.93596	0.048429	1	0	0	3	0.0295884	5	0.0494081	18	0.192293	3	0.0356774	37	0.399746
ENSMUSG00000037239	Spred3	4.36967	2.12752	0.0491326	1	6	0.0558542	4	0.0395971	3	0.0297545	19	0.203726	9	0.107428	21	0.227722
ENSMUSG00000020905	Usp43	7.89613	2.98115	0.0491409	1	18	0.219579	0	0	7	0.0909796	79	1.11003	0	0	90	1.27892
ENSMUSG00000056501	Cebpb	0.146811	-2.76796	8.8484e-20	1.48166e-15	1251	48.1465	1062	43.4641	1324	54.2903	175	7.75773	137	6.7608	142	6.36616
ENSMUSG00000030431	Tmem238	0.226222	-2.14419	3.83662e-10	3.21221e-06	592	23.8131	380	16.2546	420	17.9999	143	6.62551	50	2.5789	83	3.88915
ENSMUSG00000027637	Rab5if	0.357821	-1.48269	1.12189e-06	0.00469653	943	19.0123	678	14.5362	882	18.946	390	9.05682	152	3.92949	244	5.73052
ENSMUSG00000020358	Hnrnpab	0.438164	-1.19046	1.31891e-05	0.0441703	3128	65.0826	2067	45.7338	2349	52.0725	1303	31.2271	678	18.0883	862	20.8923
ENSMUSG00000043866	Taf10	0.436259	-1.19674	2.52294e-05	0.070411	1091	13.7764	811	10.8901	833	11.2068	385	5.59965	323	5.22978	294	4.32454
ENSMUSG00000015337	Endog	0.420706	-1.24912	0.000108739	0.205996	383	20.8555	311	18.0087	318	18.4491	116	7.2756	142	9.91472	92	5.83568
ENSMUSG00000032498	Mlh1	0.428553	-1.22245	0.000191803	0.321174	415	4.53239	263	3.05446	387	4.50316	179	2.25176	129	1.80651	76	0.966885
ENSMUSG00000054716	Zfp771	0.424019	-1.2378	0.000275784	0.419818	444	12.7926	318	9.7432	310	9.51621	209	6.93603	92	3.39886	94	3.1549
ENSMUSG00000019158	Tmem160	0.463618	-1.10899	0.00130915	1	300	19.666	247	17.2183	269	18.7877	133	10.0423	104	8.74175	83	6.33803
ENSMUSG00000026413	Pkp1	0.395843	-1.337	0.00360246	1	161	1.85495	133	1.62951	75	0.920649	51	0.676807	20	0.295465	57	0.765002
ENSMUSG00000030055	Rab43	0.40801	-1.29333	0.00378102	1	112	1.17317	139	1.54831	189	2.10928	79	0.953149	30	0.402936	52	0.634497
ENSMUSG00000038193	Hand2	0.469749	-1.09004	0.00603584	1	188	4.62872	143	3.74402	137	3.59377	50	1.41795	50	1.57849	85	2.43783
ENSMUSG00000043439	Epop	0.373729	-1.41994	0.00611567	1	120	3.00174	53	1.40983	52	1.38587	19	0.547438	23	0.737717	26	0.757612
ENSMUSG00000032098	Treh	0.389471	-1.36041	0.00711864	1	101	2.85461	43	1.29239	101	3.0414	22	0.716205	23	0.833534	34	1.1194
ENSMUSG00000047604	Frat2	0.394113	-1.34332	0.00895847	1	100	2.67855	51	1.45268	71	2.02622	19	0.586196	26	0.892985	26	0.811252
ENSMUSG00000046229	Scand1	0.463191	-1.11032	0.0101256	1	163	11.7497	115	8.81529	180	13.8242	108	8.96711	32	2.95774	49	4.11451
ENSMUSG00000060560	Ces4a	0.316644	-1.65907	0.0107848	1	364	8.65993	200	5.0599	437	11.077	214	5.8643	25	0.762647	53	1.46883
ENSMUSG00000021496	Pcbd2	0.419425	-1.25352	0.0112842	1	105	11.1315	107	12.0627	91	10.2785	54	6.59395	20	2.71871	39	4.81625
ENSMUSG00000062170	Fmr1nb	0.0419108	-4.57653	0.0126205	1	49	3.027	24	1.57662	3	0.197453	3	0.213465	0	0	0	0
ENSMUSG00000090137	Uba52	0.374457	-1.41713	0.0181564	1	73	2.82076	52	2.13671	67	2.75832	30	1.33522	8	0.396373	26	1.1703
ENSMUSG00000027523	Gnas	0.426775	-1.22845	0.0190539	1	87	0.442247	94	0.508128	97	0.525345	60	0.351307	14	0.0912524	34	0.201329
ENSMUSG00000008668	Rps18	0.112222	-3.15557	0.0220263	1	7776	183.64	447	11.2258	4375	110.082	468	12.7305	291	8.81202	389	10.7015
ENSMUSG00000112023	Lilr4b	0.335346	-1.57628	0.0235513	1	46	0.489547	46	0.520587	41	0.464887	10	0.122582	6	0.0818762	23	0.285132
ENSMUSG00000038807	Rap1gap2	0.398555	-1.32715	0.0260756	1	1273	10.2856	457	3.92658	598	5.14787	418	3.89014	128	1.32611	253	2.38123
ENSMUSG00000054000	Tusc1	0.237182	-2.07593	0.0274703	1	55	2.31703	20	0.895978	16	0.718151	10	0.485241	1	0.054018	8	0.392591
ENSMUSG00000027068	Dhrs9	0.147873	-2.75757	0.0291087	1	136	1.83886	14	0.201297	155	2.2329	13	0.202462	3	0.0520118	23	0.362259
ENSMUSG00000090298	Sult3a2	0.0481937	-4.37501	0.0308363	1	11	0.684644	78	5.16257	27	1.79045	0	0	1	0.0798073	4	0.290011
ENSMUSG00000024992	Pde6c	0.384576	-1.37866	0.0363093	1	100	1.94894	27	0.559579	48	0.996706	12	0.269382	20	0.499803	21	0.47676
ENSMUSG00000090175	Ugt1a9	0.486359	-1.03991	0.0400815	1	2745	72.5527	1748	49.1305	2255	63.5016	569	17.3226	1646	55.7842	288	8.86718
ENSMUSG00000052131	Akr1b7	0.356568	-1.48775	0.0439389	1	148	6.68756	60	2.88308	58	2.79229	37	1.92574	2	0.115879	45	2.36865
ENSMUSG00000102483	Catspere1	0.489669	-1.03012	0.0455549	1	96	1.61771	54	0.967657	137	2.45967	37	0.718157	31	0.669824	51	1.00111
